1  
2  
3  
4  
5  
6  
7  
8  
9  
10  
11  
12  
13  
14  
15  
16  
17  
18  
19  
20  
21  
22  
23  
24  
25  
26

**Adaptation and latitudinal gradients in species interactions: nest predation in birds**

Benjamin G. Freeman<sup>1,2\*</sup>, Micah N. Scholer<sup>1,2</sup>, Manfred M. A. Boehm<sup>1,3</sup>, Julian Heavyside<sup>1,2</sup>, Dolph Schluter<sup>1,2</sup>

<sup>1</sup> Biodiversity Research Centre, University of British Columbia, Vancouver, BC V6T1Z4, Canada

<sup>2</sup> Department of Zoology, University of British Columbia, Vancouver, BC V6T1Z4, Canada

<sup>3</sup> Department of Botany, University of British Columbia, Vancouver, BC V6T1Z4, Canada

\*Corresponding author: [freeman@zoology.ubc.ca](mailto:freeman@zoology.ubc.ca)

27 **Abstract**

28 The “biotic interactions” hypothesis—that stronger interspecific interactions in the  
29 tropics drive faster evolution and speciation, giving rise to the latitudinal diversity  
30 gradient—has inspired many tests of whether certain biotic interactions are indeed  
31 stronger in the tropics. However, the possibility that populations have adapted to  
32 latitudinal differences in species interactions, blunting effects on evolutionary rates,  
33 has been largely ignored. Here we show that mean rates of nest predation experienced  
34 by land birds vary minimally with latitude in the Western Hemisphere. This result is  
35 surprising because nest predation in birds is a canonical example of a strong tropical  
36 biotic interaction. We explain our finding by demonstrating that (1) rates of nest  
37 predation are in fact higher in the tropics, but only when controlling for the length of  
38 the nesting period, (2) long nesting periods are associated with reduced predation  
39 rates, and (3) tropical birds have evolved particularly long nesting periods. We  
40 suggest this is a case example of how adaptation to a biotic interaction can alter  
41 observed latitudinal gradients in interaction strength, potentially equalizing  
42 evolutionary rates among latitudes. More broadly, we advocate for tests of the biotic  
43 interactions hypothesis to consider both latitudinal patterns in interaction strength *and*  
44 evolutionary responses to these interactions.

45

46 *Keywords:* biotic interaction, latitudinal gradient, latitudinal diversity gradient, nest  
47 predation, predation, species interactions

48

49

50

51

52

53 Since Darwin, ecologists have suggested that biotic interactions increase in strength  
54 towards the Equator (Darwin 1859, Wallace 1869, Dobzhansky 1950, MacArthur  
55 1972). Dobzhansky (1950) expressed this viewpoint by arguing “Where physical  
56 conditions are easy, interrelationships between species become the paramount  
57 adaptive problem... This is probably the case in most tropical communities.” Strong  
58 biotic interactions in the tropics are hypothesized to generate strong selection that, in  
59 turn, leads to faster rates of evolution and speciation (Schemske 2009). Hence, the  
60 idea that biotic interactions are strongest in the tropics might help to explain why  
61 there are far more species at lower latitudes than in the temperate zone (the “biotic  
62 interactions hypothesis; (Schemske 2009)).

63 The biotic interactions hypothesis has inspired a growing number of studies  
64 that test the prediction that total biotic interactions are indeed strongest in the tropics  
65 (for reviews that present opposing perspectives on this literature see; (Schemske et al.  
66 2009, Moles and Ollerton 2016)). There are two principal approaches to measuring  
67 rates of biotic interactions. First, one can place the same naïve model at many sites,  
68 and measure the frequency of biotic interactions experienced by this standardized  
69 model (Roslin et al. 2017). Second, one can measure the intensity of biotic  
70 interactions that wild local populations actually experience, repeating this across a  
71 large number of sites to account for variability (Kubelka et al. 2018). A fundamental  
72 difference between these two approaches is that naïve model studies attempt to  
73 measure the biotic interaction as experienced by populations that have not adapted to  
74 local interactions, whereas wild studies measure biotic interactions as experienced by  
75 populations that have had the opportunity to adapt to local interactions (i.e., “naïve”  
76 vs. “adapted”). Hence, naïve model studies neglect the possibility that adaptation in  
77 response to interaction strength and the perpetrators of these interactions could  
78 reduce, and perhaps even eliminate, any gradient. If so, adaptations could blunt any

79 differential effects of interactions on evolutionary rates in the tropics vs. the temperate  
80 zone.

81 Here, we examine the biotic interactions hypothesis by studying nest predation  
82 in land birds. Nest predation experienced by birds is widely held to be most intense at  
83 lower latitudes (Skutch 1985, Robinson et al. 2000, Schemske et al. 2009, Mckinnon  
84 et al. 2010, Remeš et al. 2012, DeGregorio et al. 2016, Kubelka et al. 2018), but see  
85 (Martin et al. 2017). High nest predation in the tropics may be related to the fact that  
86 the tropics are home to both more species and more types of nest predators than the  
87 temperate zone, including some tropical species that prey almost exclusively upon  
88 eggs (DeGregorio et al. 2016, Menezes and Marini 2017). We test whether rates of  
89 nest predation are indeed stronger in the tropics using a newly compiled dataset of >  
90 500 estimates of daily rates of nest predation experienced by land birds populations  
91 across the Western Hemisphere. Our study measures interactions experienced by  
92 populations in nature (i.e., “adapted” interactions). We therefore explore whether  
93 tropical birds, which must deal with a distinct and diverse community of nest  
94 predators, might have evolved adaptations that reduce the rates of nest predation they  
95 experience in nature. To evaluate potential adaptations to nest predation, we focus on  
96 length of the nesting period, because longer nesting periods are associated with  
97 reduced daily rates of nest predation both within and across sites (Martin 2002).  
98 Specifically, we examine the possibility that prolonged nesting periods are a  
99 component of adaptation to the higher predator diversity in the tropics. Our synthesis  
100 thus investigates not only geographic patterns in the intensity of a biotic interaction,  
101 but also the interplay between ecological interaction and evolutionary consequence  
102 across latitudinal gradients.

103

104 **Methods**

105 *Assembling nest predation data*

106 We searched the peer-reviewed literature to find studies that have measured nest  
107 predation for land bird populations breeding in North, Central or South America. We  
108 focus on the Western Hemisphere because nest predation data for tropical birds  
109 outside of the Americas (e.g., the Asian and African tropics) is scarce (but see (Remeš  
110 et al. 2012) for an analysis of Australian birds). We included only studies of real nests  
111 because we were interested in biotic interactions experienced by populations in  
112 nature, and because predation on artificial nests is poorly correlated with predation on  
113 real nests (King et al. 1999, Burke et al. 2004, Moore and Robinson 2004, Robinson  
114 et al. 2005). We did not include studies from oceanic islands (e.g., the Galapagos)  
115 because oceanic islands often differ ecologically from nearby continents (e.g., oceanic  
116 islands typically have lower diversity of predators). We restricted our analysis to land  
117 birds—primarily passerines, but also a small number of doves, hummingbirds, and  
118 other non-passerines—, following previous studies that have investigated latitudinal  
119 trends in nest predation (Robinson et al. 2000, Remeš et al. 2012, Martin et al. 2017).  
120 In addition, we did not include cavity nesters, which differ dramatically in their  
121 nesting biology from non-cavity nesters (Martin and Li 1992). Last, we only  
122 considered studies that reported the fate of at least 10 nests, as metrics of nest success  
123 based on small sample sizes are more prone to error.

124 We compiled nest predation data by searching the peer-reviewed published  
125 literature. Several previous studies have analyzed nest predation data from the  
126 Americas (Nice 1957, Skutch 1985, Kulesza 1990, Conway and Martin 2000,  
127 Robinson et al. 2000, Boyle et al. 2016, Martin et al. 2017). These syntheses are  
128 valuable summaries of relevant studies, but did not always present the complete set of  
129 data that we were interested in for each study. Hence, we extracted data from the  
130 original publications in all cases. We then located additional studies by conducting a

131 Web of Science search in February 2018 with the keywords “Nest predation” OR  
132 “Breeding ecology” OR “Nest success” AND “bird.” Because there is a latitudinal  
133 gradient in data availability (more in the temperate zone, less in the tropics), we  
134 expended additional effort to more exhaustively search for tropical studies.  
135 Specifically, we: (1) conducted additional country-specific Web of Science searches  
136 for each nation in Central and South America, with keywords “Nest predation” OR  
137 “Nest success” AND “Country Name”, where “Country Name” was the name of  
138 every Central and South American country; (2) examined the entire publication  
139 records of individual scientists who have extensively studied Neotropical bird  
140 breeding biology; and (3) followed citation webs to search for additional relevant  
141 studies from the tropics and southern temperate zone.

142 For each species from each study that met our criteria described above, we  
143 extracted the following information: (1) Species name; (2) Sample size of nests; (3)  
144 Nest success, presented either as fledging success (often termed “apparent success”,  
145 an estimate of the percentage of nests that successfully fledge young) or as daily  
146 survival rate (or, rarely, daily predation rate); (4) Latitude and longitude; (5)  
147 Elevation (meters above sea level, extracted using the Google Maps Platform); (6)  
148 Incubation and nestling periods (extracted either from information in the paper itself,  
149 from other papers studying the breeding biology of the same species, or from  
150 Handbook of the Birds of the World Alive (del Hoyo et al. 2018); (7) Habitat.  
151 Following Tobias et al. (Tobias et al. 2013), we used standard published sources (del  
152 Hoyo et al. 2018) to classify species’ preferred habitats into three categories: “open”,  
153 for grasslands and deserts, “semi-open” for open-canopy woodland and shrubby  
154 landscapes, and “closed” for closed-canopy forest; and (8) Nest type (open vs.  
155 enclosed). We used standard published sources (del Hoyo et al. 2018) to assign  
156 categories of nest type, following Martin et al. (Martin et al. 2017) who defined open

157 cups as “cups or platforms exposed from above and the sides” and enclosed nests as  
158 those with “a constructed or natural roof that provides cover in all directions except  
159 the entrance.” While some nests do not fit clearly into one of these two categories,  
160 this binary classification is a useful way to contrast nest types that may differ in nest  
161 predation (Martin et al. 2017).

162 Our final dataset included nest predation data for 516 unique species-site  
163 combinations (from 244 studies and representing 315 species). The bulk of this  
164 dataset comes from studies conducted between ~40° South and ~50° North. The  
165 majority of studies come from the Northern Hemisphere temperate zone (270 unique  
166 species-site combinations), but the tropics (187 unique species-site combinations) and  
167 Southern Hemisphere temperate zone (59 unique species-site combinations) are also  
168 well represented (Figure 1). We note that though this dataset is larger than previous  
169 analyses of nest predation in the Western Hemisphere, this dataset is not exhaustive.  
170 In particular, there is an extensive gray literature for the northern temperate zone that  
171 we did not attempt to include.

172

### 173 *Quantifying nest predation vs. nest failure*

174 In this study we are interested in daily rates of nest predation, but researchers are  
175 seldom able to precisely quantify rates of predation compared to rates of other causes  
176 of nest failure. Predators are responsible for the large majority of nest mortality in  
177 most places (Remeš et al. 2012). As a consequence, previous syntheses have simply  
178 classified all nest failures as due to predation (Martin et al. 2017). This methodology  
179 could lead to error if predation does not account for most nest failure. More  
180 worryingly for our purposes, this methodology could lead to bias if the proportion of  
181 nest failure due to predation varies systematically along latitudinal gradients. We  
182 investigated these possibilities by extracting the cause of failure (predation vs.

183 abandonment vs. other factors) from the subset of studies that reported causes of  
184 failure. We did not include studies where authors explicitly described that nest failure  
185 was due to human activities such as mowing (e.g., birds nesting in hay fields), or, in  
186 one case, when “much of the predation is known to have been by young boys”  
187 (Peterson and Young 1950).

188 We found that the large majority of nest failures are indeed caused by  
189 predation, and that the percentage of nest failures caused by predation does not vary  
190 with latitude. Only 26% of studies (64 out of 246) attempted to identify the cause of  
191 nest failure. The mean percentage of nest failures attributed to predation from these  
192 studies was 73% ( $N = 106$  unique species-site combinations), supporting the assertion  
193 that predation accounts for the large majority of nest failure in land birds. This figure  
194 remarkably similar to that for Australian birds, where nest predation accounts for  
195 ~72% of nest failure (Remeš et al. 2012). We found no evidence that the percentage  
196 of nest failures due to predation varies as a function of latitude (slope estimate for  
197 latitude in a linear model predicting the percentage of nest failure attributed to  
198 predation =  $-0.00075 \pm 0.00078$ ,  $p = 0.343$ ). Hence, analyzing a dataset of studies that  
199 report nest success appears to be appropriate for our goal of analyzing latitudinal  
200 patterns in nest predation.

201

### 202 *Latitudinal variation in nest predation*

203 Our first goal was to assess whether daily rates of nest predation vary as a function of  
204 latitude. As previously mentioned, studies reported nest predation as either fledging  
205 success (the percentage of nests that successfully fledged young;  $N = 368$  unique  
206 species-site combinations) or daily survival rates (the probability that an egg or  
207 nestling survives from one day to the next;  $N = 267$  unique species-site  
208 combinations). Some studies reported both metrics. Daily survival rates can be



209 calculated from fledging success when the length of the nesting period (incubation +  
210 nestling periods) is known. We found published information for nesting periods for  
211 most but not all species, and converted fledging success to daily survival rates by  
212 taking fledging success to the exponent of  $1/(\text{total days of nesting period})$ . Hence we  
213 were able to compile a complete dataset of 501 unique species-site combinations  
214 measuring daily survival rates. We note that calculating daily survival rates based on  
215 fledging success can be problematic. We therefore repeated our analysis using the  
216 smaller dataset that directly report daily survival rates, and report that our main results  
217 remain unchanged when we analyzed only the subset of our dataset ( $N = 269$ ) that  
218 directly reported daily survival rates (Table S1). We analyzed daily survival rate and  
219 not daily predation rate because the majority of studies in our dataset report daily  
220 survival rates. All analyses were conducted in R (R Development Core Team 2017).

221 To estimate nest predation along the latitudinal gradient, we fit mixed effect  
222 meta-analytic models to predict daily survival rate using the “metafor” package in R  
223 (Viechtbauer 2010), which weights individual estimates by their squared standard  
224 errors, and incorporates the estimated variance among the study-specific effect sizes.  
225 We fit three models that correspond to different biological hypotheses: (1) no  
226 latitudinal gradient in predation; (2) a linear latitudinal gradient in predation; and (3) a  
227 breakpoint linear model wherein predation differs categorically between the tropics  
228 and temperate zone. We compared model fits using AIC. The first model was an  
229 intercept-only model that did not include a slope term. The second model included a  
230 single slope term that described symmetric linear regressions relating survival rate to  
231 latitude. The third model fit a breakpoint regression with zero slope for tropical  
232 latitudes ( $\leq 23.4$  degrees absolute latitude), and equal slopes for temperate latitudes.  
233 We fit an additional, fourth, model to account for non-independence among effect  
234 sizes. This model included study ID for the 244 studies (the between-study effect),

235 and species (the within-study effect) as random effects. We incorporated phylogeny  
236 into this model by specifying phylogenetic branch length as the variance-covariance  
237 matrix. Branch lengths were measured from a majority rules consensus tree calculated  
238 from 1000 phylogenies pruned to our study taxa and downloaded from birdtree.org  
239 (“Hackett” backbone; (Jetz et al. 2012)).

240

#### 241 *Latitudinal variation in nesting period duration*

242 We found that daily survival rates varied minimally with latitude (see Results), a  
243 finding seemingly at odds with previous analyses that evaluated fledging success  
244 across latitudes (Robinson et al. 2000, Schemske et al. 2009). To better understand  
245 this apparent discrepancy, we examined latitudinal patterns in the duration of nesting  
246 periods for species within our dataset. We first plotted species’ nesting period  
247 durations vs. latitude for the 295 species for which we had information on both  
248 variables. We observed clear latitudinal patterns in nesting period duration, with  
249 longer nesting periods in the tropics (see Results). Consequently, we tested the  
250 evolutionary association between latitude and nesting period duration by fitting a  
251 phylogenetic generalized least squares regression using the “ape” package (Paradis et  
252 al. 2004). The response variable in this model was nesting period duration. Absolute  
253 value of latitude was a fixed effect, and Pagel’s  $\lambda$  was estimated using maximum  
254 likelihood. We estimated evolutionary relationships for the 295 species in this  
255 analysis using a majority rules consensus tree from 1000 phylogenies downloaded  
256 from birdtree.org (“Hackett” backbone; (Jetz et al. 2012)).

257 To explore the relationship between nesting period duration and daily survival  
258 rates, we fit a meta-analytic model to predict daily survival rate using the “metafor”  
259 package. We included only data from studies that reported daily survival rates ( $N =$   
260 254; i.e., not including estimates of daily survival rates calculated using fledging

261 success and duration of nesting period). We first fit a model that estimated different  
262 slopes and intercepts for different latitudinal zones (predictor variables = nesting  
263 period duration, latitudinal zone, and an interaction between nesting period duration  
264 and latitudinal zone). We next fit a model where latitudinal zones had different  
265 intercepts but the same slope (i.e., without the interaction term between nesting period  
266 duration and latitudinal zone), and compared fit of the “different slopes” and “same  
267 slopes” models using the “anova” function. Last, we fit an additional model that  
268 included species and study as random effects, and incorporated phylogeny by  
269 specifying phylogenetic branch length as the variance-covariance matrix. Branch  
270 lengths were measured from a majority rules consensus tree calculated from 1000  
271 phylogenies pruned to our study taxa and downloaded from birdtree.org (“Hackett”  
272 backbone; (Jetz et al. 2012)).

273

#### 274 *Latitudinal variation in fledging success*

275 Last, we examined latitudinal patterns in fledging success by repeating the three meta-  
276 analytic models described above for latitudinal patterns in daily survival rate, but with  
277 fledging success as the response variable. There were 148 estimates of nest predation  
278 in our dataset with daily survival rates but not fledging success. We had information  
279 on species’ nesting periods for most but not all (132 out of 148) cases. For these 132  
280 cases, we converted daily survival rate estimates to fledging success by taking the  
281 daily survival rate to the exponent of the nesting period, which is the sum of  
282 incubation and nestling periods. We then evaluated model fit using AIC. As before,  
283 we fit an additional fourth model to account for non-independence by including study  
284 ID and species as random effects, specifying phylogenetic branch lengths as the  
285 variance-covariance matrix (calculated as previously described).

286

## 287 **Results**

### 288 *Latitudinal variation in nest predation*

289 We found evidence that daily rates of nest predation in land birds are largely invariant  
290 with latitude within the Western Hemisphere. The most supported model fit a line  
291 with equal daily survival rate (0.97) across the entire latitudinal gradient (Figure 2,  
292 Table 1). Alternative models that fit symmetric, non-zero slopes to the relationship  
293 between latitude and daily survival rates were less well supported ( $\Delta AIC \sim 3$ ; Table  
294 1). These less supported models were similar to the best-fit model in that they  
295 estimated slopes that were nearly flat (Table S2)—these models estimated daily nest  
296 survival at 60° North only slightly greater (by 0.006 to 0.012) than at the equator. Our  
297 results did not change when including phylogenetic relationships and species identity  
298 in our model (Table S3), indicating that our findings are robust to sources of non-  
299 independence in our data (e.g., phylogenetic relationships). In addition, we found  
300 support for the hypotheses that nest predation varies minimally with elevation, is  
301 similar in open nests compared with enclosed nests, and is similar in forested and  
302 open habitats (Appendix 1).

303 Thus, unlike in tests that have used naïve models to measure predation  
304 (Mckinnon et al. 2010, Roslin et al. 2017), we conclude that natural rates of nest  
305 predation are similar across latitudes. A possible explanation for this contrast between  
306 real nests and experimental nests is that adaptation to contrasting predation regimes  
307 has equalized observed rates in wild birds across latitudes.

308

### 309 *Latitudinal variation in nesting period duration*

310 Birds exhibit many adaptations to deter nest predators. We investigated the role of  
311 one specific adaptation, the length of the nesting period, which also varies  
312 considerably between the tropics and the North temperate zone (Figure 3). Here we

313 focus on the North temperate zone, because data are sparse from the South temperate  
314 zone. Eggs and chicks remain longer in the nest in the tropics compared to the North  
315 temperate zone (Martin 2002, Chalfoun and Martin 2007). Nesting periods in the  
316 tropics average ~ 30 days, approximately 20% longer than in the North temperate  
317 zone (average = ~ 25 days; Figure 3). This difference reflects repeated patterns of  
318 evolution across a diversity of avian lineages—latitude is negatively related to nesting  
319 period in a phylogenetic generalized least squares regression model ( $p < 0.0001$ ,  
320 Table S4).

321

### 322 *Evidence that nesting period is an adaptation to predation*

323 We suggest that longer nesting periods in the tropics are in part an adaptation to  
324 tropical predation regimes. In this view, longer nesting periods in the tropics lead to  
325 lower daily mortality levels on tropical nests than would be expected without a  
326 change in nestling period. Supporting this idea, when we compare species of similar  
327 nesting duration, daily survival rates are lower in the tropics than in the temperate  
328 zone. This comparison is simplest when we compare intercepts from the equal slopes  
329 model (North temperate zone vs. tropics  $p < 0.0001$ ; Figure 4, Table S5). The equal  
330 slopes model was marginally better supported than a model that fit different slopes to  
331 different latitudinal zones ( $p = 0.078$ ). When we analyze the different slopes model,  
332 we find the same result that daily survival rates are higher in the temperate zone than  
333 the tropics when controlling for nesting period (comparing estimates for North  
334 temperate zone vs. tropics for the mean nesting period of 27 days,  $p < 0.0001$ ; Table  
335 S6, Figure S1). Moreover, this result is robust to sources of non-independence in our  
336 dataset (Table S7).

337 Nesting period duration is generally positively related to daily survival rate  
338 within and across latitudinal zones (Figure 4). For example, the equal slopes model

339 estimated that a 10-day increase in nesting period is associated with a 1.7% increase  
340 in daily survival rates (Table S5; equivalent estimates from the different slopes model  
341 are a 1.1 – 2.5% increase in daily survival rates, depending on latitudinal zone; Table  
342 S6, Figure S1). The suspected reason is that a longer nesting period is associated with  
343 fewer visits to the nest per day by attending parents, reducing nest detection by nest  
344 predators (Matysioková and Remeš 2018).

345

#### 346 *Latitudinal variation in fledging success*

347 The observation that nesting periods are longer in the tropics, while daily survival  
348 rates are similar across latitudes, implies that fledgling success is higher in the  
349 temperate zone compared to the tropics. Indeed, we found strong evidence that  
350 fledging success of nests is highest in the temperate zone (Figure 5, Tables 2). The  
351 best-fit model was a breakpoint regression that estimated ~32% of nests successfully  
352 fledge nestlings within the tropics while ~ 56% of nests successfully fledge nestlings  
353 at 60° North (Table S8). This result that is robust to sources of non-independence in  
354 our data (Table S9). We note that this pattern is not a demonstration of higher overall  
355 predation in the tropics because fledging success in the tropics and the temperate zone  
356 is based on mortality accumulated over different time spans.

357

#### 358 **Discussion**

359 We report that natural rates of nest predation experienced by land birds are similar  
360 along a latitudinal gradient in the Americas stretching from ~ 40° South to ~ 60°  
361 North. This result is surprising, because nest predation has long been known to be  
362 intense in the tropics (Skutch 1985). Indeed, nest predation in land birds has been put  
363 forth as a good example of the more general pattern that biotic interactions are  
364 stronger at low latitudes (Schemske 2009). We suggest that similar rates of nest

365 predation in nature between tropical and temperate zone birds may be explained if  
366 populations have adapted to local predation regimes.

367         We hypothesize that the evolution of longer nesting periods is one way that  
368 tropical birds have adapted to the greater diversity of nest predators in the tropics.  
369 Supporting this hypothesis, when we compare species with similar nesting periods,  
370 rates of nest predation are higher on average in the tropics than in the temperate zone.  
371 We further show that longer nesting periods are generally associated with higher daily  
372 survival rates even within the tropics and within the temperate zone, and that bird  
373 lineages repeatedly evolve longer nesting periods within the tropics. Thus, we  
374 hypothesize that tropical birds have achieved higher daily survival rates in part by  
375 evolving longer nesting periods (moving to the right and upwards along the regression  
376 line for daily survival vs. nesting period in Figure 4). We wish to make clear that  
377 many factors likely exert selection on nesting periods (e.g., shorter breeding seasons  
378 in the temperate zone may select for faster nesting periods in high latitude birds). In  
379 addition, the evolutionary association we document between tropical birds and long  
380 nesting periods could reflect a combination of tropical birds evolving prolonged  
381 nesting periods and temperate zone birds evolving shorter nesting periods. Overall,  
382 and despite these caveats, our results suggest that adaptation to different predation  
383 regimes may largely equalize observed rates of nest predation in land birds.

384         One possible mechanism by which populations evolve longer nesting periods  
385 is simply by reducing the time they spend at their nest (nest attentiveness). Indeed,  
386 bird species that seldom visit their nest have longer nesting periods (Chalfoun and  
387 Martin 2007, Martin et al. 2007) but see (Tieleman et al. 2004). In turn, reduced nest  
388 attentiveness has repeatedly evolved in association with increased nest predation risk  
389 (Matysioková and Remeš 2018). The negative correlation between evolved nest  
390 attentiveness and ambient predation risk is particularly strong in the tropics,

391 consistent with the idea that predation risk for nesting birds is especially high in  
392 tropical environments (Matysioková and Remeš 2018). These observations are  
393 consistent with the possibility that birds experiencing high predation risk (e.g. in the  
394 tropics) tend to evolve longer nesting periods. We note that other life history traits,  
395 such as adult survival, can explain variation in nesting period durations (Martin  
396 2002), and that disentangling drivers of evolution of life history traits is a difficult  
397 task.

398

### 399 *Implications for the biotic interactions hypothesis*

400 The biotic interactions hypothesis posits that high species richness in the tropics  
401 generate strong biotic interactions that lead to faster evolutionary rates—and  
402 ultimately faster speciation—in the tropics. Our results are inconsistent with this  
403 hypothesis. While predation on naïve models in the tropics may be higher in the  
404 tropics where there are more predators (Roslin et al. 2017), we find that predation  
405 experienced by nesting tropical birds in nature is not higher than in the temperate  
406 zone. We attribute our finding of similar rates of predation across latitudes in part to  
407 anti-nest predator adaptations of tropical birds.

408       It remains an open question whether our results are unique to nest predation in  
409 land birds. However, three arguments that represent difficulties for the biotic  
410 interactions hypothesis are: (1) the direction of causality may be reversed—it is  
411 possible that stronger total biotic interactions in the tropics are a consequence of  
412 higher tropical species diversity rather than its cause; (2) Stronger total interactions do  
413 not necessarily lead to stronger selection (Benkman 2013); and (3) Recent speciation  
414 rates appear to be highest in the temperate zones (and lower in the tropics), at least for  
415 birds and marine fishes (Weir and Schluter 2007, Schluter and Pennell 2017, Rabosky  
416 et al. 2018).



417

418 *Comparison with previous studies of latitudinal gradients in nest predation*

419 While tropical birds have long been thought to suffer greater nest predation than  
420 temperate zone birds (Robinson et al. 2000, Schemske et al. 2009, Kubelka et al.  
421 2018), not all previous studies have supported this idea (Martin et al. 2017). This  
422 discrepancy may result from using different metrics of nest predation—daily rates vs.  
423 fledging success—that are measured over non-equivalent time periods. Our finding  
424 that fledging success is much lower in tropical birds is in agreement with previous  
425 analyses of fledging success (Robinson et al. 2000, Schemske et al. 2009). However,  
426 this pattern is deceptive because daily mortality rates are in fact similar across  
427 latitudes. We suggest that lower fledging success in the tropics results mainly because  
428 tropical birds accumulate mortality over a greater number of days in the tropics than  
429 in the temperate zone. The degree to which our findings can be extrapolated to other  
430 regions remains uncertain: While a previous global study found no latitudinal gradient  
431 in daily rate of nest predation (Martin et al. 2017), rates of nest predation are indeed  
432 higher in the tropics in Australia (Remeš et al. 2012); note that this study found much  
433 greater longitudinal variation in nest predation than latitudinal variation). Here we  
434 focus on the Western Hemisphere, where we conclude that the long-held view that  
435 nest predation is higher in the tropics is mainly derived from the reduced fledging  
436 success of tropical birds (Skutch 1985, Schemske 2009), which is more a  
437 consequence of a longer nesting period than a lower daily survival rate. Since they are  
438 measured over different time periods on average, fledging success rates in the tropics  
439 and the temperate zone do not adequately measure overall survival rates at the two  
440 latitudes.

441

442 *Conclusions*

443 The biotic interactions hypothesis invokes strong biotic interactions in the tropics to  
444 explain the origin of high tropical species richness. This intriguing proposal has  
445 spawned intense interest in documenting latitudinal clines in interaction strength. We  
446 add to this literature by showing evidence that a latitudinal gradient in rates of nest  
447 predation suffered by land birds in the Americas is weak or absent. Yet documenting  
448 gradients in interaction strength is only part of the story. The idea that species can  
449 adapt to strong interactions, potentially blunting their effects, has been comparatively  
450 ignored. Here we report that rates of predation suffered by land birds are similar  
451 across latitudes, and present evidence that this lack of a latitudinal gradient is in part  
452 due to adaptation on the part of tropical birds. Specifically, tropical birds experience  
453 greater daily risk of predation, but only when holding nesting period constant; tropical  
454 birds have evolved long nesting periods that reduce the daily risk of predation they  
455 experience in nature. We suggest this is an example of how an adaptation to strong  
456 negative biotic interactions can flatten the observed latitudinal gradient in interaction  
457 strength. More broadly, we advocate for an increased focus on the evolutionary  
458 consequences of biotic interactions.

459

#### 460 **Acknowledgements**

461 This research was supported by postdoctoral fellowships from the Biodiversity  
462 Research Centre and Banting Canada (#379958) to BGF. None of our funders had  
463 any influence on the content of the submitted manuscript, and none of our funders  
464 required approval of the final manuscript to be published. Comments from the  
465 Schluter lab group and Ralf Yorque greatly improved this manuscript.

466

#### 467 **Author contributions**

468 BGF conceived of this project; BGF, MNS, MAB and JH conducted the literature  
469 search; BGF and DS conducted analyses with input from all authors. BGF wrote the  
470 manuscript with input from all authors.

471

472

## 473 **References**

- 474 Badyaev, A. V, and C. K. Ghalambor. 2001. Evolution of life histories along  
475 elevational gradients: Trade-off between parental care and fecundity. *Ecology*  
476 82:2948–2960.
- 477 Benkman, C. W. 2013. Biotic interaction strength and the intensity of selection.  
478 *Ecology Letters* 16:1054–1060.
- 479 Boyle, A. W., B. K. Sandercock, and K. Martin. 2016. Patterns and drivers of  
480 intraspecific variation in avian life history along elevational gradients: A meta-  
481 analysis. *Biological Reviews* 91:469–482.
- 482 Burke, D. M., K. Elliott, L. Moore, W. Dunford, E. Nol, J. Phillips, S. Holmes, K.  
483 Freemark, J. Phittips, and K. Freemarktt. 2004. Patterns of Nest Predation on  
484 Artificial and Natural Nests in Forests. *Conservation Biology* 18:381–388.
- 485 Chalfoun, A. D., and T. E. Martin. 2007. Latitudinal variation in avian incubation  
486 attentiveness and a test of the food limitation hypothesis. *Animal Behaviour*  
487 73:579–585.
- 488 Conway, C. J., and T. E. Martin. 2000. Evolution of Passerine Incubation Behavior :  
489 Influence of Food , Temperature , and Nest Predation. *Evolution* 54:670–685.
- 490 Darwin, C. 1859. On the origin of species by means of natural selection. J. Murray,  
491 London,.
- 492 DeGregorio, B. A., S. J. Chiavacci, T. J. Benson, J. H. Sperry, and P. J. Weatherhead.  
493 2016. Nest Predators of North American Birds: Continental Patterns and

- 494 Implications. *BioScience* 66:655–665.
- 495 Dobzhansky, T. 1950. Evolution in the tropics. *American Scientist* 38:209–221.
- 496 del Hoyo, J., A. Elliott, J. Sargatal, D. Christie, and de J. E. 2018. Handbook of the  
497 Birds of the World Alive.
- 498 Jankowski, J. E., G. A. Londoño, S. K. Robinson, and M. A. Chappell. 2012.  
499 Exploring the role of physiology and biotic interactions in determining  
500 elevational ranges of tropical animals. *Ecography* 36:1–12.
- 501 Jetz, W., G. H. Thomas, J. B. Joy, K. Hartmann, and A. O. Mooers. 2012. The global  
502 diversity of birds in space and time. *Nature* 491:444–448.
- 503 King, D. I., R. M. DeGraaf, C. R. Griffin, and T. J. Maier. 1999. Do Predation Rates  
504 on Artificial Nests Accurately Reflect Predation Rates on Natural Bird Nests?  
505 *Journal of Field Ornithology* 70:257–262.
- 506 Kubelka, V., M. Šálek, P. Tomkovich, Z. Végvári, R. Freckleton, and T. Székely.  
507 2018. Global pattern of nest predation is disrupted by climate change in  
508 shorebirds. *Science* 362:680–683.
- 509 Kulesza, G. 1990. An analysis of clutch size in New World passerine birds. *Ibis*  
510 132:407–422.
- 511 MacArthur, R. H. 1972. *Geographical ecology: patterns in the distribution of species*.  
512 Princeton University Press, Princeton.
- 513 Martin, T. E. 2002. A new view of avian life-history evolution tested on an incubation  
514 paradox. *Proceedings of the Royal Society B: Biological Sciences* 269:309–316.
- 515 Martin, T. E., S. K. Auer, R. D. Bassar, A. M. Niklison, and P. Lloyd. 2007.  
516 Geographic variation in avian incubation periods and parental influences on  
517 embryonic temperature. *Evolution* 61:2558–2569.
- 518 Martin, T. E., A. J. Boyce, K. Fierro-Calderón, A. E. Mitchell, C. E. Armstad, J. C.  
519 Mouton, and E. E. Bin Soudi. 2017. Enclosed nests may provide greater thermal

- 520 than nest predation benefits compared with open nests across latitudes.  
521 *Functional Ecology* 31:1231–1240.
- 522 Martin, T. E., and P. Li. 1992. Life history traits of open-vs. cavity-nesting birds.  
523 *Ecology* 73:579–592.
- 524 Matysioková, B., and V. Remeš. 2018. Evolution of parental activity at the nest is  
525 shaped by the risk of nest predation and ambient temperature across bird species.  
526 *Evolution* 72:2214–2224.
- 527 Mckinnon, L., P. A. Smith, E. Nol, J. L. Martin, F. I. Doyle, K. F. Abraham, H. G.  
528 Gilchrist, R. I. G. Morrison, and J. Bêty. 2010. Lower Predation Risk for  
529 Migratory birds. *Science* 327:6–8.
- 530 Menezes, J. C. T., and M. Â. Marini. 2017. Predators of bird nests in the Neotropics: a  
531 review. *Journal of Field Ornithology* 88:99–114.
- 532 Moles, A. T., and J. Ollerton. 2016. Is the notion that species interactions are stronger  
533 and more specialized in the tropics a zombie idea? *Biotropica* 48:141–145.
- 534 Moore, R. P., and W. D. Robinson. 2004. Artificial Bird Nests , External Validity,  
535 and Bias in Ecological Field Studies. *Ecology* 85:1562–1567.
- 536 Nice, M. 1957. Nesting Success in Altricial Birds. *The Auk* 74:305–321.
- 537 Paradis, E., J. Claude, and K. Strimmer. 2004. APE: analyses of phylogenetics and  
538 evolution in R language. *Bioinformatics* 20:289–290.
- 539 Peterson, A., and H. Young. 1950. A nesting study of the Bronzed Grackle. *The Auk*  
540 67:466–476.
- 541 R Development Core Team. 2017. R: A language and environment for statistical  
542 computing. R Foundation for Statistical Computing, Vienna, Austria.
- 543 Rabosky, D. L., J. Chang, P. O. Title, P. F. Cowman, L. Sallan, M. Friedman, K.  
544 Kaschner, C. Garilao, T. J. Near, M. Coll, and M. E. Alfaro. 2018. An inverse  
545 latitudinal gradient in speciation rate for marine fishes. *Nature* 559:392–395.

- 546 Remeš, V., B. Matysioková, and A. Cockburn. 2012. Long-term and large-scale  
547 analyses of nest predation patterns in Australian songbirds and a global  
548 comparison of nest predation rates. *Journal of Avian Biology* 43:435–444.
- 549 Robinson, W. D., T. R. Robinson, S. K. Robinson, and J. D. Brawn. 2000. Nesting  
550 Success of Understory Forest Birds in Central Panama. *Journal of Avian Biology*  
551 31:151–164.
- 552 Robinson, W. D., J. N. Styrsky, and J. D. Brawn. 2005. Are artificial bird nests  
553 effective surrogates for estimating predation on real bird nests? A test with  
554 tropical birds. *The Auk* 122:843–852.
- 555 Roslin, T., B. Hardwick, V. Novotny, W. K. Petry, N. R. Andrew, A. Asmus, I. C.  
556 Barrio, Y. Basset, A. L. Boesing, T. C. Bonebrake, E. K. Cameron, W. Dáttilo,  
557 D. A. Donoso, P. Drozd, C. L. Gray, D. S. Hik, S. J. Hill, T. Hopkins, S. Huang,  
558 B. Koane, B. Laird-Hopkins, L. Laukkanen, O. T. Lewis, S. Milne, I. Mwesige,  
559 A. Nakamura, C. S. Nell, E. Nichols, A. Prokurat, K. Sam, N. M. Schmidt, A.  
560 Slade, V. Slade, A. Suchanková, T. Teder, S. van Nouhuys, V. Vandvik, A.  
561 Weissflog, V. Zhukovich, and E. M. Slade. 2017. Higher predation risk for insect  
562 prey at low latitudes and elevations. *Science* 356.
- 563 Schemske, D. 2009. Biotic interactions and speciation in the tropics. Page (Butlin R,  
564 Bridle J, and Schluter D, Eds.) *Speciation and patterns of diversity*. Cambridge  
565 University Press.
- 566 Schemske, D. W., G. G. Mittelbach, H. V Cornell, J. M. Sobel, and K. Roy. 2009. Is  
567 there a latitudinal gradient in the importance of biotic interactions? *Annual*  
568 *Review of Ecology, Evolution, and Systematics* 40:245–269.
- 569 Schluter, D., and M. W. Pennell. 2017. Speciation gradients and the distribution of  
570 biodiversity. *Nature* 546:48–55.
- 571 Skutch, A. F. 1985. Clutch size, nesting success, and predation on nests of

- 572 Neotropical birds, reviewed. *Ornithological Monographs* 36:575–594.
- 573 Tieleman, B. I., J. B. Williams, and R. E. Ricklefs. 2004. Nest attentiveness and egg  
574 temperature do not explain the variation in incubation periods in tropical birds.  
575 *Functional Ecology* 18:571–577.
- 576 Tobias, J. A., C. K. Cornwallis, E. P. Derryberry, S. Claramunt, R. T. Brumfield, and  
577 N. Seddon. 2013. Species coexistence and the dynamics of phenotypic evolution  
578 in adaptive radiation. *Nature* 506:359–363.
- 579 Viechtbauer, W. 2010. Conducting meta-analyses in R with the metafor package.  
580 *Journal of Statistical Software* 36:1–48.
- 581 Wallace, A. R. 1869. *The Malay Archipelago*. Cosimo Classics.
- 582 Weir, J. T., and D. Schluter. 2007. The latitudinal gradient in recent speciation and  
583 extinction rates of birds and mammals. *Science* 315:1574.
- 584
- 585
- 586
- 587
- 588
- 589
- 590

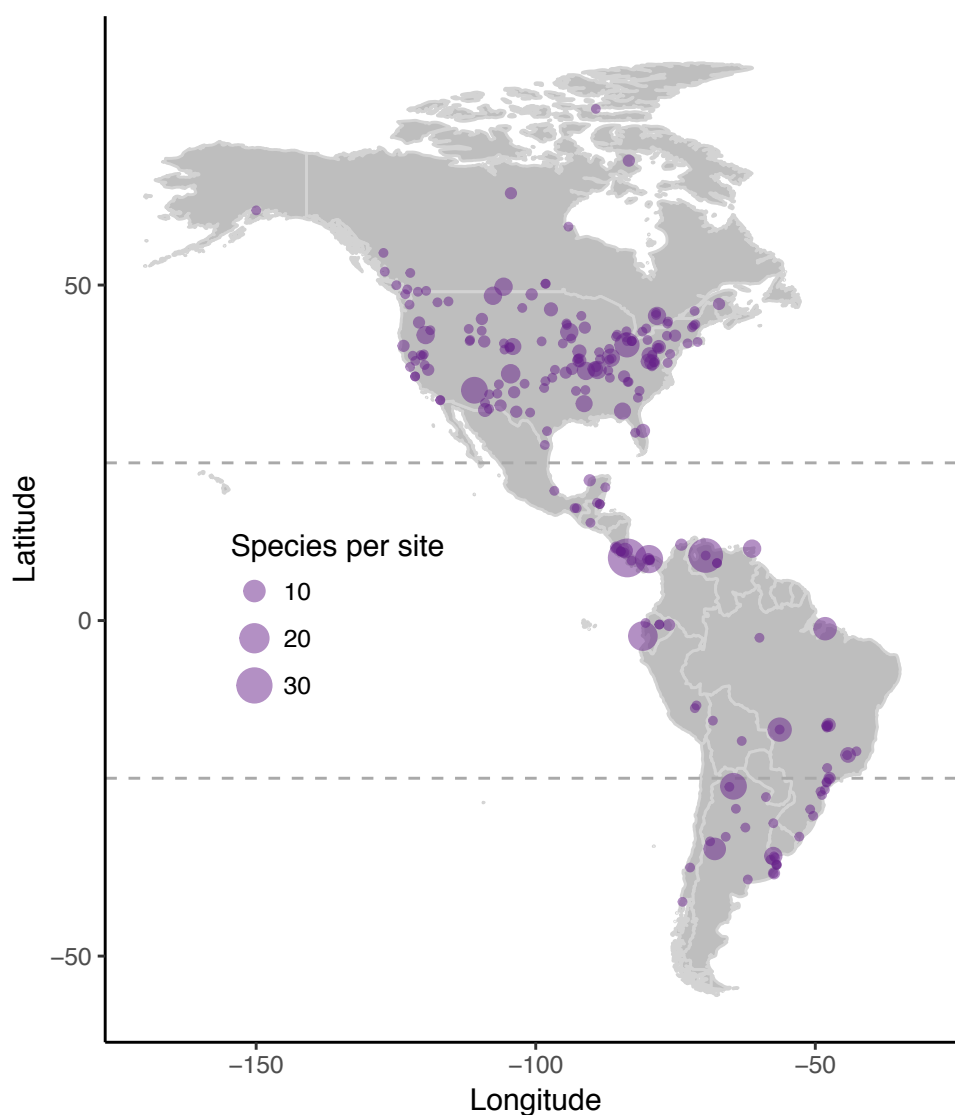

591

592 Figure 1. Map of the 244 studies included in our dataset that measured nest predation

593 experienced by land birds in the Americas. Many studies report data for multiple

594 species from the same site, illustrated by the size of the circle. The Tropics of Cancer

595 and Capricorn (at 23.4° N and S, respectively) delimit the tropics, and are illustrated

596 with dashed lines.



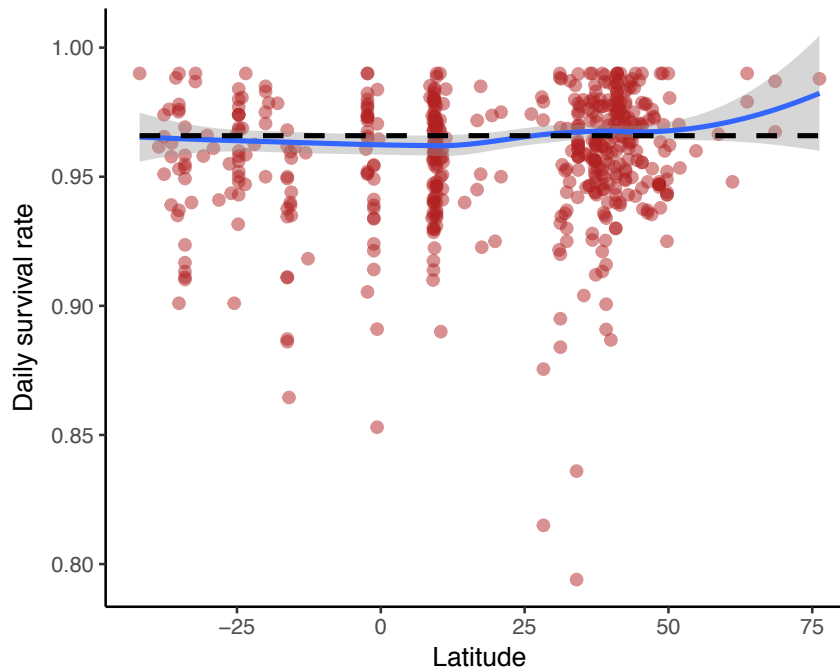

597

598 Figure 2. Daily survival rates of nesting birds along latitudinal gradients in the  
599 Americas. Predictions from the best-fit metafor model are plotted as a dashed line—  
600 this simple model fit a constant value for daily survival rates across latitudes.

601 Summary statistics from individual studies are plotted ( $N = 501$ ). For comparison, the  
602 loess fit, which used the same weights for each data point as the best-fit model, and  
603 incorporates the same estimated variance among the study-specific effect sizes, is  
604 plotted in blue with shaded 95% confidence intervals.

605

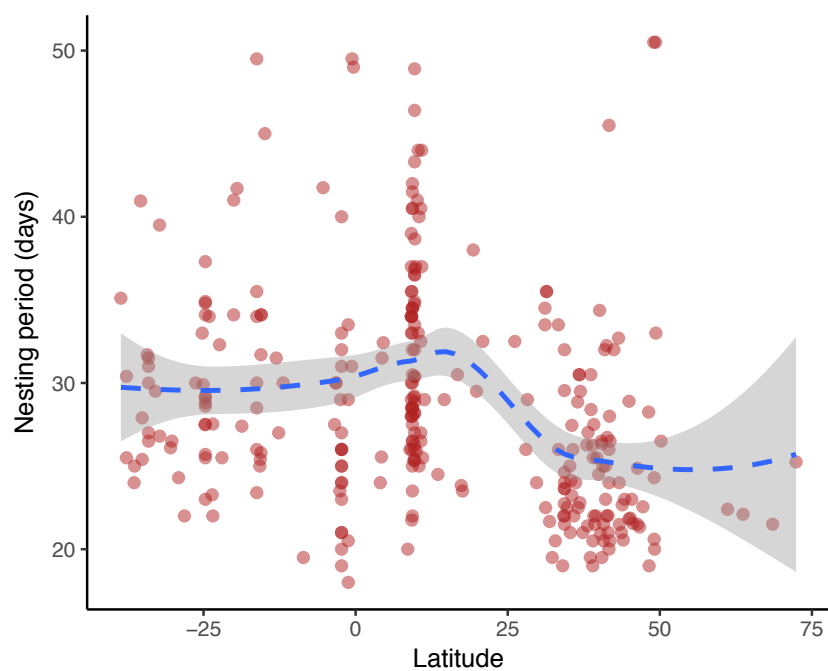

606

607 Figure 3. Mean nesting period duration varies predictably with latitude. Species in our

608 dataset with known nesting period duration (N = 295) are plotted. The dashed line

609 illustrates the loess trendline, with 95% confidence intervals shaded in gray. Nesting

610 periods average ~ 30 days within the tropics but ~25 days within the North temperate

611 zone.

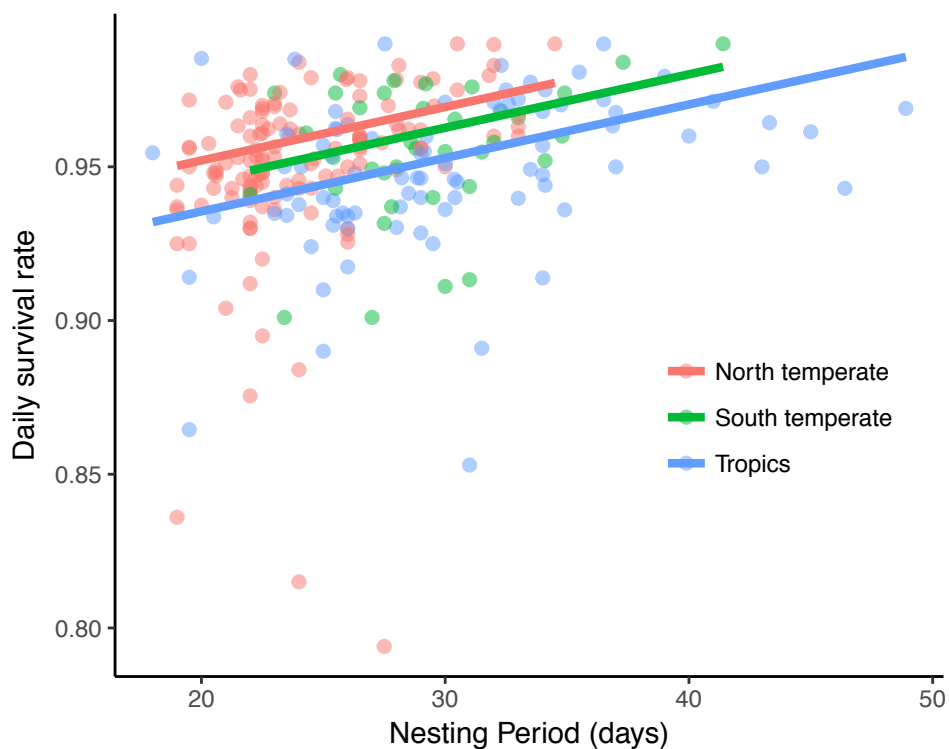

612

613 Figure 4. Daily survival rate increases with nesting period length, but with different  
614 intercepts for different latitudinal zones. Predictions from a metafor model are plotted  
615 as solid lines, and values from individual studies are plotted in colors corresponding  
616 to their latitudinal zone (N = 254; including only studies that reported daily survival  
617 rates).

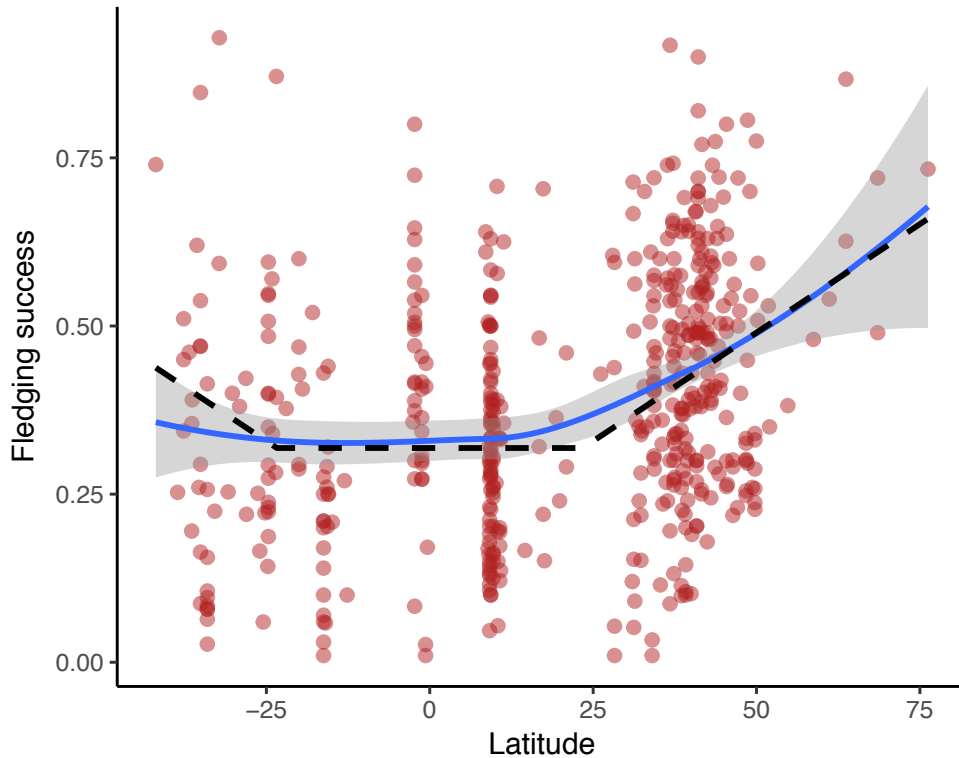

618

619 Figure 5. Fledging success of nesting birds along latitudinal gradients in the  
620 Americas. Predictions from the best-fit model in metafor—a symmetric breakpoint  
621 regression that fit a line with zero slope within the tropics and a positive slope within  
622 the temperate zone—, are plotted as a dashed line. Values from individual studies are  
623 plotted (N = 500). For comparison, the loess fit, which used the same weights for each  
624 data point as the best-fit model, and incorporated the same estimated variance among  
625 the study-specific effect sizes, is plotted in blue with shaded 95% confidence  
626 intervals.

627

628

629

630

631

632

633 Table 1. Model comparison of metafor models with daily survival rate as the response  
634 variable. The best-fit model fit a constant value of daily survival rate across the entire  
635 latitudinal expanse of the dataset.

| <b>Model</b>                                              | <b><math>\Delta</math>AIC</b> |
|-----------------------------------------------------------|-------------------------------|
| Constant (daily survival rates do not vary with latitude) | --                            |
| Linear regression                                         | 3.68                          |
| Breakpoint regression (breakpoint = 23.4°)                | 3.86                          |

636

637

638 Table 2. Model comparison of metafor models with fledging success as the response  
639 variable. The best-fit model was a symmetric breakpoint regression that fit a line with  
640 zero slope within the tropics and a positive slope within the temperate zone.

| <b>Model</b>                                            | <b><math>\Delta</math>AIC</b> |
|---------------------------------------------------------|-------------------------------|
| Breakpoint regression (breakpoint = 23.4°)              | --                            |
| Linear regression                                       | 11.95                         |
| Constant (fledging success does not vary with latitude) | 51.40                         |

641

642

643

644

645

646

647

648

649

650

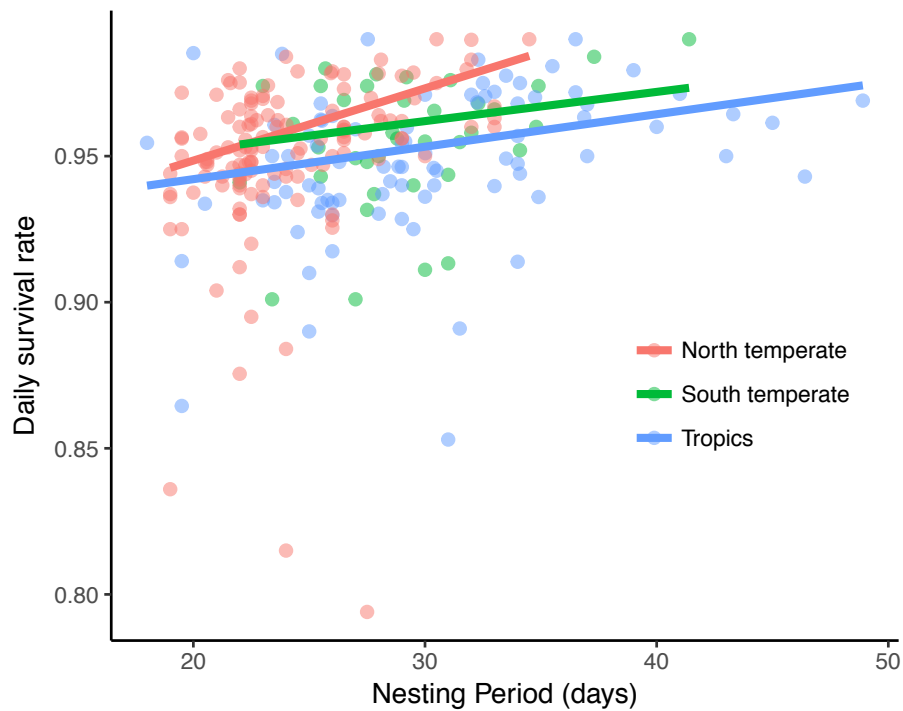

651

652 Figure S1. The relationship between nesting period length and daily survival rate in  
653 the North temperate zone, the tropics, and the South temperate zone (different slopes  
654 model). Predictions from a metafor model are plotted as solid lines, and values from  
655 individual studies are plotted in colors corresponding to their latitudinal zone (N =  
656 254; including only studies that reported daily survival rates).

657

658

659

660

661

662

663

664

665

666 Table S1. Model comparison of metafor models with daily survival rate as the  
 667 response variable for only studies that directly reported daily survival rate (N = 269).  
 668 The best-fit model was a simple model that fit a constant value of daily survival rate  
 669 across the entire latitudinal expanse of the dataset.

| <b>Model</b>                                              | <b>ΔAIC</b> |
|-----------------------------------------------------------|-------------|
| Constant (daily survival rates do not vary with latitude) | --          |
| Linear regression                                         | 6.98        |
| Breakpoint regression (breakpoint = 23.4°)                | 7.52        |

670  
 671 Table S2. Parameter estimates for fixed effects from metafor models with daily  
 672 survival rate as the response variable. Slope estimates for the linear regression are for  
 673 straight lines outward from the equator towards higher latitudes; slope estimates for  
 674 breakpoint regression are for straight lines outward from the tropics (23.4 degrees  
 675 latitude) towards higher latitudes.

| <b>Model</b>                                     | <b>Intercept ± SE</b> | <b>Slope ± SE</b> |
|--------------------------------------------------|-----------------------|-------------------|
| Intercept-only<br>(constant)                     | 0.97 ± 0.001          | NA                |
| Linear regression                                | 0.96 ± 0.0025         | 0.0001 ± 0.0001   |
| Breakpoint<br>regression<br>(breakpoint = 23.4°) | 0.96 ± 0.0017         | 0.0002 ± 0.0001   |

676  
 677  
 678  
 679  
 680

681 Table S3. Model summary of intercept-only metafor model with daily survival rate as  
682 the response variable and study, species and phylogeny as random effects.

| <b>Effect</b>      | <b>Estimate</b>        |
|--------------------|------------------------|
| Intercept (fixed)  | 0.97 (se = 0.0049)     |
| Study (random)     | 0.0001 (sqrt = 0.0093) |
| Species (random)   | 0.0000 (sqrt = 0)      |
| Phylogeny (random) | 0.0001 (sqrt = 0.0099) |

683

684

685

686 Table S4. Parameter estimates for fixed effects from phylogenetic generalized least  
687 squares regression model with nesting period as the response variable. Pagel's  $\lambda$  for  
688 this model was 0.99.

| <b>Parameter</b>             | <b>Estimate <math>\pm</math> SE</b> |
|------------------------------|-------------------------------------|
| Intercept                    | 31.57 $\pm$ 2.91                    |
| Absolute value<br>(latitude) | -0.074 $\pm$ 0.015                  |

689

690

691

692

693

694

695

696

697



698 Table S5. Parameter estimates from a metafor model with daily survival rate as the  
699 response variable, based on data from studies that reported daily survival rates (i.e.,  
700 not including studies where we calculated daily survival rates from fledging success  
701 using the known nesting period). This is the “equal slopes” model where different  
702 latitudinal zones have the same slope. The reference category for the intercept is the  
703 North temperate zone; parameter estimates for the South temperate zone and tropics  
704 represent deviations from this reference category.

| <b>Parameter</b>     | <b>Estimate ± SE</b> |
|----------------------|----------------------|
| Intercept            | 0.92 ± 0.0075        |
| Nesting period       | 0.0017 ± 0.0003      |
| South temperate zone | -0.0067 ± 0.0047     |
| Tropics              | -0.017 ± 0.0039      |

705  
706  
707  
708  
709  
710  
711  
712  
713  
714  
715  
716  
717  
718

719 Table S6. Parameter estimates from a metafor model with daily survival rate as the  
720 response variable, based on data from studies that reported daily survival rates (i.e.,  
721 not including studies where we calculated daily survival rates from fledging success  
722 using the known nesting period). This is the “different slopes” model where different  
723 latitudinal zones have different slopes. The reference category for “Nesting period” is  
724 the North temperate zone; parameter estimates for “Nesting Period: South temperate  
725 zone” and “Nesting Period: Tropics” represent deviations from this reference  
726 category.

| <b>Parameter</b>                     | <b>Estimate ± SE</b> |
|--------------------------------------|----------------------|
| Intercept                            | 0.90 ± 0.011         |
| Nesting period                       | 0.0025 ± 0.0004      |
| South temperate zone                 | 0.033 ± 0.033        |
| Tropics                              | 0.021 ± 0.018        |
| Nesting period: South temperate zone | -0.0015 ± 0.0012     |
| Nesting period: Tropics              | -0.0014 ± 0.0006     |

727

728

729

730

731

732

733

734

735

736

737

738 Table S7. Parameter estimates from a metafor model with daily survival rate as the  
739 response variable and study, species and phylogeny as random effects, based on data  
740 from studies that reported daily survival rates (i.e., not including studies where we  
741 calculated daily survival rates from fledging success using the known nesting period).  
742 This is the “equal slopes” model where different latitudinal zones have the same  
743 slope. The reference category for the intercept is the North temperate zone; parameter  
744 estimates for the South temperate zone and tropics represent deviations from this  
745 reference category.

| <b>Parameter</b>     | <b>Estimate ± SE</b> |
|----------------------|----------------------|
| Intercept            | 0.92 ± 0.0079        |
| Nesting period       | 0.0016 ± 0.0003      |
| South temperate zone | -0.0088 ± 0.0059     |
| Tropics              | -0.016 ± 0.0042      |
| Study (random)       | 0.001 (sqrt = 0.008) |
| Species (random)     | 0.0 (sqrt = 0.0)     |
| Phylogeny (random)   | 0.0 (sqrt = 0.0)     |

746

747

748

749

750

751

752

753

754

755

756 Table S8. Parameter estimates for fixed effects from metafor models with fledging  
757 success as the response variable. Slope estimates for the linear regression are for  
758 straight lines outward from the equator towards higher latitudes; slope estimates for  
759 breakpoint regression are for straight lines outward from the tropics (23.4 degrees  
760 latitude) towards higher latitudes.

| <b>Model</b>                                     | <b>Intercept ± SE</b> | <b>Slope ± SE</b> |
|--------------------------------------------------|-----------------------|-------------------|
| Intercept-only<br>(constant)                     | 0.39 ± 0.0085         | NA                |
| Linear regression                                | 0.28 ± 0.018          | 0.0036 ± 0.0005   |
| Breakpoint<br>regression<br>(breakpoint = 23.4°) | 0.32 ± 0.012          | 0.0065 ± 0.0008   |

761  
762  
763  
764  
765  
766  
767  
768  
769  
770  
771  
772  
773  
774

775 Table S9. Model summary of breakpoint regression metafor model with fledging  
776 success as the response variable and study, species and phylogeny as random effects.  
777

| <b>Effect</b>      | <b>Estimate</b>      |
|--------------------|----------------------|
| Intercept (fixed)  | 0.31 (se = 0.017)    |
| Slope (fixed)      | 0.0081 (se = 0.0011) |
| Study (random)     | 0.015 (sqrt = 0.12)  |
| Species (random)   | 0.012 (sqrt = 0.11)  |
| Phylogeny (random) | 0 (sqrt = 0.0040)    |

778  
779  
780  
781  
782  
783  
784  
785  
786  
787  
788  
789  
790  
791  
792  
793  
794

795 **Appendix 1**

796

797 **Other hypothesized drivers of nest predation**

798 We additionally evaluated three additional hypotheses in the literature that have  
799 proposed nest predation is; (1) higher at low elevations than at high elevations;  
800 (Jankowski et al. 2012); (2) higher in species that build open cup nests than in species  
801 that build enclosed nests; reviewed in (Martin et al., 2017); and (3) higher in forest  
802 habitats than open habitats; (Skutch, 1985). Specifically, we added the pertinent  
803 covariate (elevation, nest type, or habitat type) to the best-fit latitudinal model one at  
804 a time and used AIC to compare model fit with and without the covariate.

805 We found little evidence to support existing hypotheses that elevation, nest  
806 type and habitat explain variation in daily survival rates (Table A1). Nest predation  
807 was unrelated to elevation, though we caution that our dataset included few studies  
808 from high elevations (e.g., only 27 estimates of nest predation were from above 2,000  
809 m) and that the relationship between nest predation and elevation may not necessarily  
810 be linear, as we assume in our analysis. Despite these caveats, our results are  
811 consistent with previous meta-analyses that have found minimal influence of  
812 elevation on nest predation within temperate zone species (Badyaev and Ghalambor  
813 2001, Boyle et al. 2016). In addition, daily survival rates were similar in enclosed vs.  
814 open cup nests, consistent with the findings of a recent study that argued predation is  
815 unlikely to drive the evolution of enclosed nests (Martin et al. 2017). Last, daily  
816 survival rates were generally similar among habitats (e.g. closed canopy forests vs.  
817 more open habitats). At a broad scale, this does not support Skutch's (1985)  
818 suggestion that "the real contrast may be, not between tropical and temperate regions,  
819 but between wild woodland, where predators abound, and man-made habitats, where  
820 predation is much reduced." However, the habitat categories we used may be too

821 coarse to capture the habitat differences that Skutch hypothesized to be relevant to  
822 nest predation.  
823  
824 Table A1. Model comparison to assess three covariates (nest shape, elevation and  
825 habitat type) hypothesized to influence rates of nest predation. We compared the best-  
826 fit model—a simple intercept-only model— with and without each covariate.

| <b>Model</b>                | <b><math>\Delta</math>AIC</b> |
|-----------------------------|-------------------------------|
| Best fit model              | --                            |
| Best fit model + Nest shape | 3.47                          |
| Best fit model + Elevation  | 6.15                          |
| Best fit model + Habitat    | 6.47                          |

827
